# Supplementary material for: Recent Insights on Genetic Testing in Primary Prostate Cancer
Source: Springer Nature journal article supplement (doi:10.1007/s40291-021-00529-3), 2021-06-12
Supplement: MOESM1 [file 24437204]

## **Recent insights on genetic testing in primary prostate cancer diagnosis**

Mona Kafka<sup>1</sup>, Cristian Surcel<sup>2,3</sup> and Isabel Heidegger<sup>1</sup>

<sup>1</sup>Department of Urology, Medical University Innsbruck, Innsbruck, Austria

<sup>2</sup>Carol Davila University of Medicine and Pharmacy, Bucharest, Romania

<sup>3</sup>Fundeni Clinical Institute, Department of Urology, Bucharest, Romania

### **Supplementary Table 1: Literature overview**

**Specific sorting of all search results (N=111):**

**1. Included clinical trial (N=34)**

| Title                                                                                                                                                                                         | Authors          | Journal                          | Year |
|-----------------------------------------------------------------------------------------------------------------------------------------------------------------------------------------------|------------------|----------------------------------|------|
| A cohort analysis of men with a family history of BRCA1/2 and Lynch mutations for prostate cancer                                                                                             | Kerr et al.      | BMC Cancer                       | 2016 |
| A Genetic Risk Score to Personalize Prostate Cancer Screening, Applied to Population Data                                                                                                     | Huynh-Le et al.  | Cancer Epidemiol Biomarkers Prev | 2020 |
| A personalised approach to prostate cancer screening based on genotyping of risk founder alleles                                                                                              | Cybulski et al.  | Br J Cancer                      | 2013 |
| Association of Genomic Domains in BRCA1 and BRCA2 with Prostate Cancer Risk and Aggressiveness                                                                                                | Patel et al.     | Cancer Res                       | 2020 |
| Cancer Risks Associated With Germline PALB2 Pathogenic Variants: An International Study of 524 Families                                                                                       | Yang et al.      | J Clin Oncol                     | 2020 |
| Cancers associated with BRCA1 and BRCA2 mutations other than breast and ovarian                                                                                                               | Mersch et al.    | Cancer                           | 2015 |
| Characterization of the Cancer Spectrum in Men With Germline BRCA1 and BRCA2 Pathogenic Variants: Results From the Consortium of Investigators of Modifiers of BRCA1/2 (CIMBA)                | Silvestri et al. | JAMA Oncol                       | 2020 |
| Clinical and histopathological characteristics of familial prostate cancer in Finland                                                                                                         | Pakkanen et al.  | BJU Int                          | 2012 |
| Clinical significance of PON1 L55M, Q192R and I102V polymorphisms and their association with prostate cancer risk in Polish men                                                               | Heise et al.     | Pol J Pathol                     | 2020 |
| Clinical testing with a panel of 25 genes associated with increased cancer risk results in a significant increase in clinically significant findings across a broad range of cancer histories | Rosenthal et al. | Cancer Genet                     | 2017 |
| Diagnosing hereditary cancer predisposition in men with prostate cancer                                                                                                                       | Pritzlaff et al. | Genet Med                        | 2020 |
| Differences in cancer prevalence among CHEK2 carriers identified via multi-gene panel testing                                                                                                 | Sutcliffe et al. | Cancer Genet                     | 2020 |
| Epidemiologic, clinical, and molecular characteristics of hereditary prostate cancer in Latvia                                                                                                | Abele et al.     | Medicina (Kaunas)                | 2011 |
| Ethnic disparities among men with prostate cancer undergoing germline testing                                                                                                                 | Kwon et al.      | Urol Oncol                       | 2020 |
| Finnish Fanconi anemia mutations and hereditary predisposition to breast and prostate cancer                                                                                                  | Mantere et al.   | Clin Genet                       | 2015 |
| G84E germline mutation in HOXB13 gene is associated with increased prostate cancer risk in Polish men                                                                                         | Heise et al.     | Pol J Pathol                     | 2019 |
| Genetic analyses supporting colorectal, gastric, and prostate cancer syndromes                                                                                                                | Wallander et al. | Genes Chromosomes Cancer         | 2019 |
| Germline genetic variants in men with prostate cancer and one or more additional cancers                                                                                                      | Pilie et al.     | Cancer                           | 2017 |
| Germline mutations in HOXB13 and prostate-cancer risk                                                                                                                                         | Ewing et al.     | N Engl J Med                     | 2012 |
| Germline Pathogenic Variants in 7636 Japanese Patients With Prostate Cancer and 12 366 Controls                                                                                               | Momozawa et al.  | J Natl Cancer Inst               | 2020 |
| Identification of Incidental Germline Mutations in Patients With Advanced Solid Tumors Who Underwent Cell-Free Circulating Tumor DNA Sequencing                                               | Slavin et al.    | J Clin Oncol                     | 2018 |
| Interim Results from the IMPACT Study: Evidence for Prostate-specific Antigen Screening in BRCA2 Mutation Carriers                                                                            | Page et al.      | Eur Urol                         | 2019 |

|                                                                                                                                                                                                      |                      |                          |      |
|------------------------------------------------------------------------------------------------------------------------------------------------------------------------------------------------------|----------------------|--------------------------|------|
| Known susceptibility SNPs for sporadic prostate cancer show a similar association with "hereditary" prostate cancer                                                                                  | Cremers et al.       | Prostate                 | 2015 |
| PALB2, CHEK2 and ATM rare variants and cancer risk: data from COGS                                                                                                                                   | Southey et al.       | J Med Genet              | 2016 |
| Finnish Fanconi anemia mutations and hereditary predisposition to breast and prostate cancer                                                                                                         | Seibert et al.       | BMJ                      | 2018 |
| Population-based estimate of prostate cancer risk for carriers of the HOXB13 missense mutation G84E                                                                                                  | MacInnis et al.      | PLoS One                 | 2013 |
| Prevalence of Suspected Hereditary Cancer Syndromes and Germline Mutations Among a Diverse Cohort of Proband Reporting a Family History of Prostate Cancer: Toward Informing Cascade Testing for Men | Chandrasekar et al.  | Eur Urol Oncol           | 2020 |
| Prevalence of the HOXB13 G84E germline mutation in British men and correlation with prostate cancer risk, tumour characteristics and clinical outcomes                                               | Kote-Jarai et al.    | Ann Oncol                | 2015 |
| Prostate cancer incidence in males with Lynch syndrome                                                                                                                                               | Haraldsdottir et al. | Genet Med                | 2014 |
| Risk of Prostate Cancer Associated With Familial and Hereditary Cancer Syndromes                                                                                                                     | Beebe-Dimmer et al.  | J Clin Oncol             | 2020 |
| Targeted prostate cancer screening in BRCA1 and BRCA2 mutation carriers: results from the initial screening round of the IMPACT study                                                                | Bancroft et al.      | Eur Urol                 | 2014 |
| The role of germline mutations in the BRCA1/2 and mismatch repair genes in men ascertained for early-onset and/or familial prostate cancer                                                           | Maia et al.          | Fam Cancer               | 2016 |
| The spectrum of urological malignancy in Lynch syndrome                                                                                                                                              | Barrow et al.        | Fam Cancer               | 2013 |
| Truncating and missense PPM1D mutations in early-onset and/or familial/hereditary prostate cancer patients                                                                                           | Cardoso et al.       | Genes Chromosomes Cancer | 2016 |

## 2. Not medically relevant (e.g. psychological or economic aspects) (N=13)

| Title                                                                                                                                              | Authors           | Journal           | Year |
|----------------------------------------------------------------------------------------------------------------------------------------------------|-------------------|-------------------|------|
| "I Am Uncertain About What My Uncertainty Even Is": Men's Uncertainty and Information Management of Their BRCA-Related Cancer Risks                | Rauscher et al.   | J Genet Couns     | 2018 |
| Engaging Men With BRCA-Related Cancer Risks: Practical Advice for BRCA Risk Management From Male Stakeholders                                      | Dean et al.       | Am J Mens Health  | 2020 |
| Genetic testing in the European Union: does economic evaluation matter?                                                                            | Antonanzas et al. | Eur J Health Econ | 2012 |
| gsSKAT: Rapid gene set analysis and multiple testing correction for rare-variant association studies using weighted linear kernels                 | Larson et al.     | Genet Epidemiol   | 2017 |
| SNP interaction pattern identifier (SIPI): an intensive search for SNP-SNP interaction patterns                                                    | Lin et al.        | Bioinformatics    | 2017 |
| The effect of sample size on polygenic hazard models for prostate cancer                                                                           | Karunamuni et al. | Eur J Hum Genet   | 2020 |
| The Genetic Education for Men (GEM) Trial: Development of Web-Based Education for Untested Men in BRCA1/2-Positive Families                        | Peshkin et al.    | J Cancer Educ     | 2019 |
| Understanding of multigene test results among males undergoing germline testing for inherited prostate cancer: Implications for genetic counseling | Giri et al.       | Prostate          | 2018 |
| What factors may influence psychological well being at three months and one year post BRCA genetic result disclosure?                              | Bosch et al.      | Breast            | 2012 |

|                                                                                                                                              |                   |                         |      |
|----------------------------------------------------------------------------------------------------------------------------------------------|-------------------|-------------------------|------|
| What men want: Qualitative analysis of what men with prostate cancer (PCa) want to learn regarding genetic referral, counseling, and testing | Greenberg et al.  | Prostate                | 2020 |
| AA9int: SNP interaction pattern search using non-hierarchical additive model set                                                             | Lin et al.        | Bioinformatics          | 2018 |
| Development and validation of a 36-gene sequencing assay for hereditary cancer risk assessment                                               | Vysotskaia et al. | PeerJ                   | 2017 |
| Development and validation of next generation sequencing based 35-gene hereditary cancer panel                                               | Chan et al.       | Hered Cancer Clin Pract | 2020 |

### 3. Not specific enough (e.g. genetic pathways, carcinogenesis) (N=16)

| Title                                                                                                                                                                                                 | Authors                | Journal                 | Year |
|-------------------------------------------------------------------------------------------------------------------------------------------------------------------------------------------------------|------------------------|-------------------------|------|
| Alcohol consumption and prostate cancer incidence and progression: A Mendelian randomisation study                                                                                                    | Brunner et al.         | Int J Cancer            | 2017 |
| Cancer screening in Australia: future directions in melanoma, Lynch syndrome, and liver, lung and prostate cancers                                                                                    | Weber et al.           | Public Health Res Pract | 2019 |
| Genetic cancer predisposition syndromes among older adults                                                                                                                                            | Chavarri-Guerra et al. | J Geriatr Oncol         | 2020 |
| Genomics of Prostate Cancer: What Nurses Need to Know                                                                                                                                                 | McReynolds et al.      | Semin Oncol Nurs        | 2019 |
| Germline testing for prostate cancer: community urology perspective                                                                                                                                   | Concepcion et al.      | Can J Urol              | 2019 |
| Identification of genetic biomarkers in urine for early detection of prostate cancer                                                                                                                  | Kavalci et al.         | Curr Probl Cancer       | 2020 |
| Inequities in multi-gene hereditary cancer testing: lower diagnostic yield and higher VUS rate in individuals who identify as Hispanic, African or Asian and Pacific Islander as compared to European | Ndugga-Kabuye et al.   | Fam Cancer              | 2019 |
| Lung, Breast, and Prostate Cancer Patients with Unknown Ethnicity in US Department of Defense Cancer Registry Data: Comparisons to Patients with Known Ethnicity                                      | Lin et al.             | J Registry Manag        | 2017 |
| New name for breast-cancer syndrome could help to save lives                                                                                                                                          | Pritchard et al.       | Nature                  | 2019 |
| Population prevalence of familial cancer and common hereditary cancer syndromes. The 2005 California Health Interview Survey                                                                          | Scheuner et al.        | Genet Med               | 2010 |
| Prevalence and causes of elevated bone mass                                                                                                                                                           | Nottez et al.          | Bone                    | 2020 |
| Publisher Correction: Shared heritability and functional enrichment across six solid cancers                                                                                                          | Jiang et al.           | Nat Commun              | 2019 |
| A comparison of isolated circulating tumor cells and tissue biopsies using whole-genome sequencing in prostate cancer                                                                                 | Jiang et al.           | Oncotarget              | 2015 |
| Assessing the role of insulin-like growth factors and binding proteins in prostate cancer using Mendelian randomization: Genetic variants as instruments for circulating levels                       | Bonilla et al.         | Int J Cancer            | 2016 |
| Germline Mutations in DNA Repair Genes in Patients With Metastatic Castration-resistant Prostate Cancer                                                                                               | Holeckova et al.       | In Vivo                 | 2020 |
| Microsatellite Instability Is Associated With the Presence of Lynch Syndrome Pan-Cancer                                                                                                               | Latham et al.          | J Clin Oncol            | 2019 |

### 4. Genetic testing in other tumor entities (N=19)

| Title                                                                                                                                                                         | Author       | Journal  | Year |
|-------------------------------------------------------------------------------------------------------------------------------------------------------------------------------|--------------|----------|------|
| Analysis of Founder Mutations in Rare Tumors Associated With Hereditary Breast/Ovarian Cancer Reveals a Novel Association of BRCA2 Mutations with Ampulla of Vater Carcinomas | Pinto et al. | PLoS One | 2016 |

|                                                                                                                                                               |                   |                            |      |
|---------------------------------------------------------------------------------------------------------------------------------------------------------------|-------------------|----------------------------|------|
| Application of Hereditary Renal Cell Carcinoma Risk Criteria to a Large Prospective Database                                                                  | Kushnir et al.    | Clin Oncol (R Coll Radiol) | 2020 |
| ATM whole gene deletion in an Italian family with hereditary pancreatic cancer: Challenges to cancer risk prediction associated with an 11q22.3 microdeletion | Arts et al.       | Cancer Genet               | 2020 |
| BAP1 Syndrome - Predisposition to Malignant Mesothelioma, Skin and Uveal Melanoma, Renal and Other Cancers                                                    | Foretova et al.   | Klin Onkol                 | 2019 |
| Characteristics of individuals with breast cancer rearrangements in BRCA1 and BRCA2                                                                           | Jackson et al.    | Cancer                     | 2014 |
| Comprehensive genetic characterization of hereditary breast/ovarian cancer families from Slovakia                                                             | Konecny et al.    | Breast Cancer Res Treat    | 2011 |
| Germline mutation prevalence in individuals with pancreatic cancer and a history of previous malignancy                                                       | Dudley et al.     | Cancer                     | 2018 |
| High risk men's perceptions of pre-implantation genetic diagnosis for hereditary breast and ovarian cancer                                                    | Quinn et al.      | Hum Reprod                 | 2010 |
| Incidence of Pathogenic Variants in Those With a Family History of Pancreatic Cancer                                                                          | Macklin et al.    | Front Oncol                | 2018 |
| Lynch Syndrome: Genomics Update and Imaging Review                                                                                                            | Cox et al.        | Radiographics              | 2018 |
| Malignant Peripheral Nerve Sheath Tumor in a Patient With BAP1 Tumor Predisposition Syndrome                                                                  | Kaszuba et al.    | World Neurosurg            | 2018 |
| Men seeking counselling in a Breast Cancer Risk Evaluation Clinic                                                                                             | Freitas et al.    | Ecancermedicalscience      | 2018 |
| Polymorphisms in MMP-1, MMP-2, MMP-7, MMP-13 and MT2A do not contribute to breast, lung and colon cancer risk in polish population                            | Bialkowska et al. | Hered Cancer Clin Pract    | 2020 |
| Prevention and Screening in Hereditary Breast and Ovarian Cancer                                                                                              | Zeichner et al.   | Oncology (Williston Park)  | 2016 |
| Recurrent large genomic rearrangements in BRCA1 and BRCA2 in an Irish case series                                                                             | McVeigh et al.    | Cancer Genet               | 2017 |
| Rescreening for genetic mutations using multi-gene panel testing in patients who previously underwent non-informative genetic screening                       | Frey et al.       | Gynecol Oncol              | 2015 |
| BRCA1 and BRCA2 mutations in males with familial breast and ovarian cancer syndrome. Results of a Spanish multicenter study                                   | de Juan et al.    | Fam Cancer                 | 2015 |
| CDKN1B V109G polymorphism a new prognostic factor in sporadic medullary thyroid carcinoma                                                                     | Pasquali et al.   | Eur J Endocrinol           | 2011 |
| Population prevalence of individuals meeting criteria for hereditary breast and ovarian cancer testing                                                        | Greenberg et al.  | Cancer Med                 | 2019 |

### 5. Animal Studies (N=3)

| Title                                                                                                                                | Authors        | Journal       | Year |
|--------------------------------------------------------------------------------------------------------------------------------------|----------------|---------------|------|
| CD24 Is Not Required for Tumor Initiation and Growth in Murine Breast and Prostate Cancer Models                                     | Cremers et al. | PLoS One      | 2016 |
| Chromosome instability and carcinogenesis: insights from murine models of human pancreatic cancer associated with BRCA2 inactivation | Cassidy et al. | Mol Oncol     | 2014 |
| DNA-Encoded Library-Derived DDR1 Inhibitor Prevents Fibrosis and Renal Function Loss in a Genetic Mouse Model of Alport Syndrome     | Richter et al. | ACS Chem Biol | 2019 |

### 6. Case Reports (N=2)

| Title                                                                          | Authors            | Journal    | Year |
|--------------------------------------------------------------------------------|--------------------|------------|------|
| Contiguous gene deletion of chromosome 2p16.3-p21 as a cause of Lynch syndrome | Salo-Mullen et al. | Fam Cancer | 2018 |

|                                                                                                                                             |              |               |      |
|---------------------------------------------------------------------------------------------------------------------------------------------|--------------|---------------|------|
| DNA Damage Repair (DDR) Mutations and the Utility of High-Risk Genetics Clinics in Metastatic Castration-Refractory Prostate Cancer (mCRPC) | Rathi et al. | World J Oncol | 2018 |
|---------------------------------------------------------------------------------------------------------------------------------------------|--------------|---------------|------|

### 7. Prostate cancer but not focused on genetic testing (N=4)

| Title                                                                                                                              | Authors        | Journal                          | Year |
|------------------------------------------------------------------------------------------------------------------------------------|----------------|----------------------------------|------|
| Digitoxin Inhibits Epithelial-to-Mesenchymal-Transition in Hereditary Castration Resistant Prostate Cancer                         | Pollard et al. | Front Oncol                      | 2019 |
| Effect of family history on outcome in German patients treated with radical prostatectomy for clinically localised prostate cancer | Heck et al.    | Eur J Cancer                     | 2012 |
| The clinical phenotype of hereditary versus sporadic prostate cancer: HPC definition revisited                                     | Cremers et al. | Prostate                         | 2016 |
| Circulating Metabolic Biomarkers of Screen-Detected Prostate Cancer in the ProtecT Study                                           | Adams et al.   | Cancer Epidemiol Biomarkers Prev | 2019 |

### 8. Reviews (N=16)

| Title                                                                                                                    | Authors            | Journal                     | Year |
|--------------------------------------------------------------------------------------------------------------------------|--------------------|-----------------------------|------|
| Application Areas of Traditional Molecular Genetic Methods and NGS in relation to Hereditary Urological Cancer Diagnosis | Mikhaylenko et al. | J Oncol                     | 2020 |
| Familial prostate cancer                                                                                                 | Giri et al.        | Semin Oncol                 | 2016 |
| Genetic testing for hereditary prostate cancer: Current status and limitations                                           | Zhen et al.        | Cancer                      | 2018 |
| Hereditary Predisposition to Prostate Cancer: From Genetics to Clinical Implications                                     | Brandao et al.     | Int J Mol Sci               | 2020 |
| Hereditary prostate cancer - Primetime for genetic testing?                                                              | Heidegger et al.   | Cancer Treat Rev            | 2019 |
| How I Do It: Genetic counseling and genetic testing for inherited prostate cancer                                        | Giri et al.        | Can J Urol                  | 2016 |
| Metastatic Prostate Cancer: Effects of Genetic Testing on Care                                                           | Connors et al.     | Clin J Oncol Nurs           | 2019 |
| Molecular genetics and targeted therapy of WNT-related human diseases (Review)                                           | Katoh et al.       | Int J Mol Med               | 2017 |
| Prostate cancer screening in BRCA and Lynch syndrome mutation carriers                                                   | Castro et al.      | Am Soc Clin Oncol Educ Book | 2013 |
| Screening for familial and hereditary prostate cancer                                                                    | Lynch et al.       | Int J Cancer                | 2016 |
| The Role of BRCA Testing in Hereditary Pancreatic and Prostate Cancer Families                                           | Pilarski et al.    | Am Soc Clin Oncol Educ Book | 2019 |
| Urological cancer related to familial syndromes                                                                          | Costa et al.       | Int Braz J Urol             | 2017 |
| BRCA1- and BRCA2-Associated Hereditary Breast and Ovarian Cancer                                                         | Petrucelli et al.  | GeneReviews                 | 1993 |
| Dysregulation of the homeobox transcription factor gene HOXB13: role in prostate cancer                                  | Decker et al.      | Pharmgenomics Pers Med      | 2014 |
| Genitourinary cancer predisposition syndromes                                                                            | Gallagher et al.   | Hematol Oncol Clin North Am | 2010 |
| Human genome meeting 2016 : Houston, TX, USA. 28 February - 2 March 2016                                                 | Srivastava et al.  | Hum Genomics                | 2016 |

### 9. Consensus decisions (N=2)

| Title                                                                                                          | Authors     | Journal      | Year |
|----------------------------------------------------------------------------------------------------------------|-------------|--------------|------|
| Implementation of Germline Testing for Prostate Cancer: Philadelphia Prostate Cancer Consensus Conference 2019 | Giri et al. | J Clin Oncol | 2020 |

|                                                                                                                       |             |              |      |
|-----------------------------------------------------------------------------------------------------------------------|-------------|--------------|------|
| Role of Genetic Testing for Inherited Prostate Cancer Risk:<br>Philadelphia Prostate Cancer Consensus Conference 2017 | Giri et al. | J Clin Oncol | 2018 |
|-----------------------------------------------------------------------------------------------------------------------|-------------|--------------|------|
